# Supplementary material for: Interactions of the Greater Ontong Java mantle plume component with the Osbourn Trough
Source: PubMed Central journal article supplement (PMC5116616; doi:10.1038/srep37561), 2016-11-21
Supplement: srep37561-s1.pdf [file srep37561-s1.pdf]

# **Interactions of the Greater Ontong Java mantle plume component with the Osbourn Trough**

Guo-Liang Zhang<sup>1,2\*</sup>, Chao Li<sup>3†</sup>

<sup>1</sup> Key Laboratory of Marine Geology and Environment, Institute of Oceanology,  
Chinese Academy of Sciences, Qingdao 266071, China

<sup>2</sup> Laboratory for Marine Geology, Qingdao National Laboratory for Marine Science  
and Technology, Qingdao, 266061, China

<sup>3</sup> Institute of Geology Chinese Academy of Geological Sciences, Beijing 100037,  
China

\* Corresponding author. E-mail: zhangguoliang@qdio.ac.cn

† Corresponding author. E-mail: re-os@163.com.

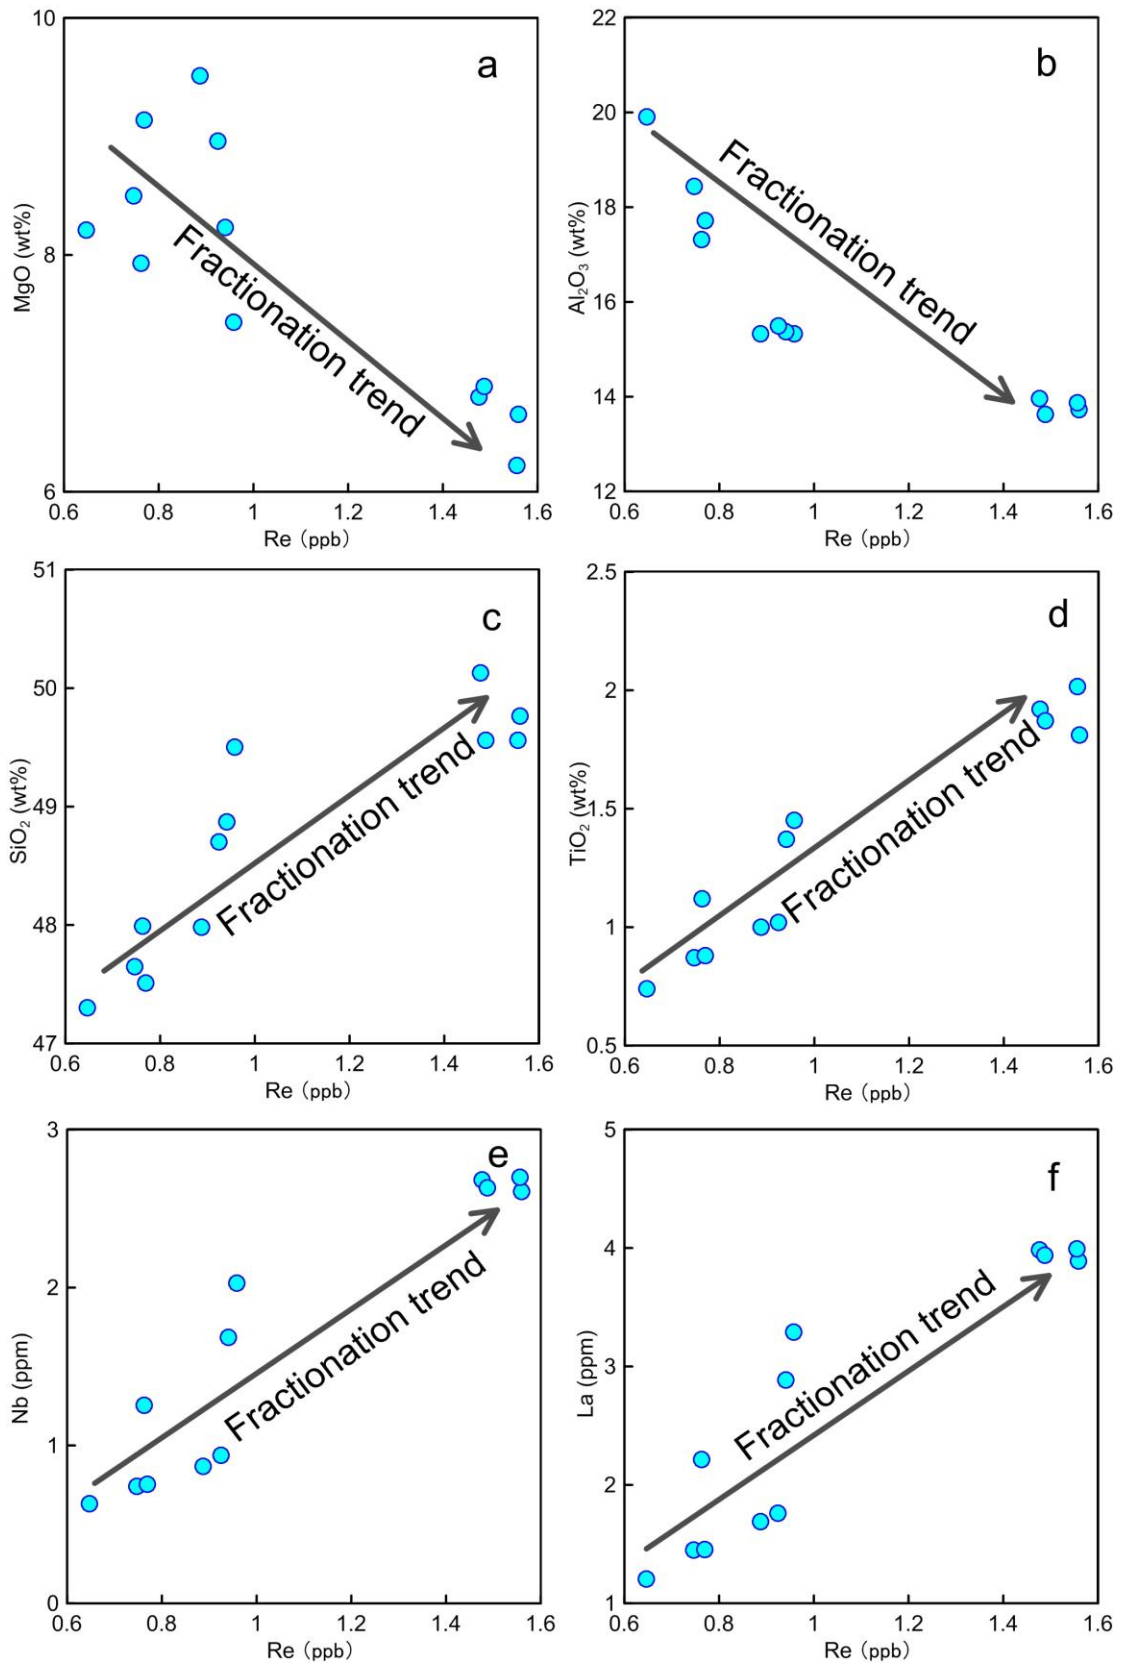

**Figure S1** Plots showing relationships of Re with (a) MgO, (b) Al<sub>2</sub>O<sub>3</sub>, (c) SiO<sub>2</sub>, (d) TiO<sub>2</sub>, (e) Nb and (f) La.

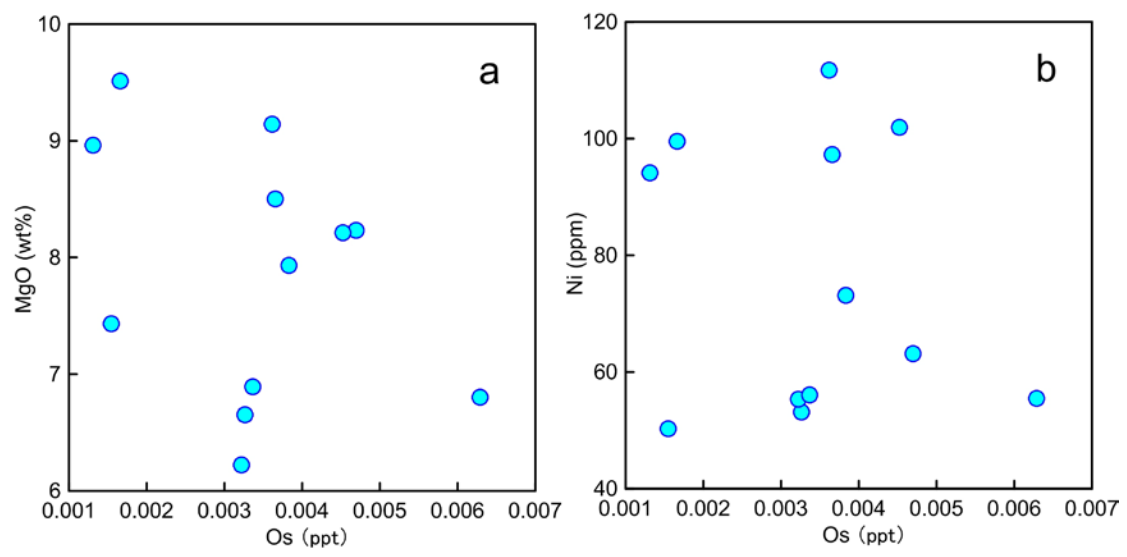

**Figure S2.** Plots showing relationships of Os vs. (a) MgO and (b) Ni.
